# Supplementary material for: ZHX3 promotes the progression of urothelial carcinoma of the bladder via repressing of RGS2 and is a novel substrate of TRIM21
Source: PubMed Central journal article supplement — Cancer Sci. 2021 Mar 9;112(5):1758–71. doi: 10.1111/cas.14810 (PMC8088937; doi:10.1111/cas.14810), 2021-03-09
Supplement: CAS-112-1758-s002.pdf [file CAS-112-1758-s002.pdf]

**A**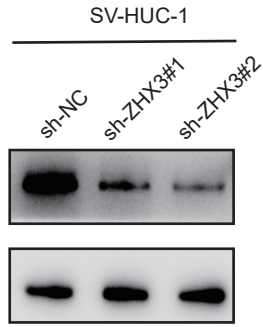**B**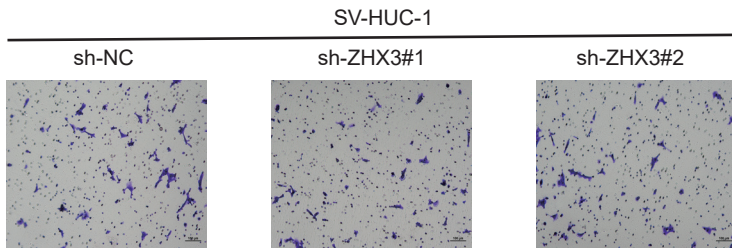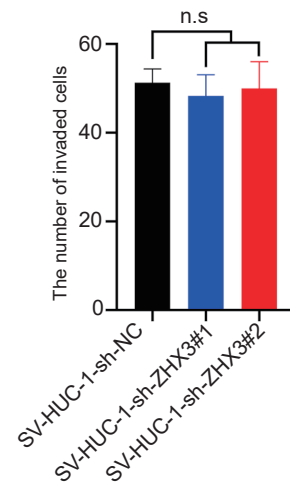**C**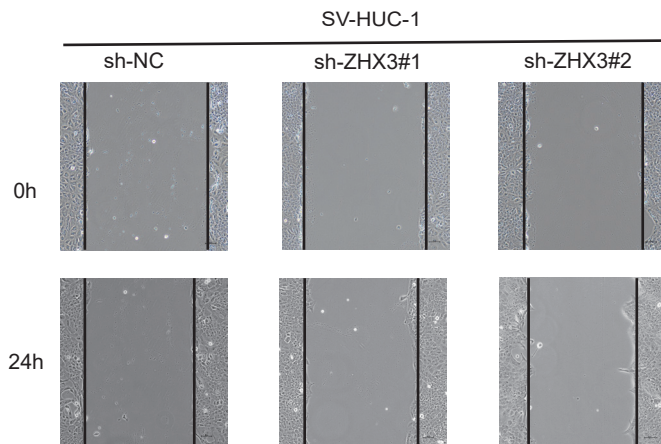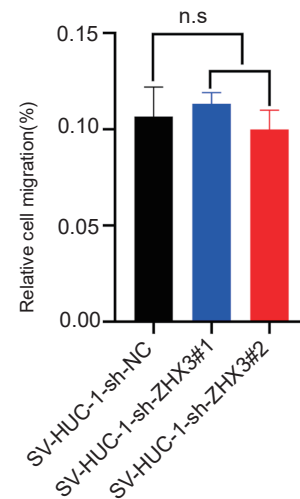

**The effect of knocking out ZHX3 in SV-HUC-1 cells. (A)** Knockdown of ZHX3 using two shRNAs resulted in decreased ZHX3 protein levels in SV-HUC-1 cells. **(B-C)** Knocking out ZHX3 in SV-HUC-1 cells did not affect the cell migration and invasion activities.
